# Supplementary material for: Global profiling of DNA methylation erasure in mouse primordial germ cells
Source: HighWire-hosted journal article supplement (doi:10.1101/gr.130997.111), 2012-02-22
Supplement: Supplemental_Table_2_revised.xlsx [file Supplemental_Table_2_revised.xlsx]

## Sheet:  
Supplemental Table 2: List of genomic regions with persistent cytosine methylation in E13.5 PGCs.
Coordinates (mm8)	size (bp)	Localisation	Single copy	Repeat class	Promoter class	Associated RefSeq gene	Contains a CpG island	Distance to nearest LTR repeat (bp)	RRBS CpG methylation data from Smallwood et al. Supplementary Table 1*
									CGI-ID	Sperm	d5 oocytes	d20 GV oocytes	Dnmt3a WT GV oocytes	Dnmt3a-/- GV oocytes	Dnmt3L WT GV oocytes	Dnmt3L-/- GV oocytes	Blastocysts
chr1:78386894-78388028	1134	intergenic	No	LTR ERV1		upstream of Mogat1	No
chr1:87482646-87483268	622	intragenic	No	Segmental duplication		Sp100	No
chr1:187007302-187008084	782	intragenic	Yes	Flanking an IAP		Iars2	No	0 (IAP)
chr2:30051554-30052184	630	intergenic	No	LTR ERV1		upstream of Lrrc8a	No
chr2:113632662-113633138	476	intragenic	Yes			Arhgap11a	No	1550 (MalR)
chr3:93738330-93738896	566	gene promoter	No	LTR ERVK	LCP	Tdpoz2	No
chr3:94141652-94142281	629	intergenic	No	LTR ERVK		upstream of Tdpoz1	No
chr3:107648646-107649130	484	intergenic	Yes			upstream of Slc6a17	No	1100 (MalR)
chr4:146487696-146488230	534	intergenic	No	LTR ERV1		upstream of 2610305D13Rik	No
chr5:103785455-103785955	500	intragenic	Yes			Ptpn13	No	7400 (ERVK)
chr5:134844024-134844624	600	intragenic	Yes			Syna	No	640 (ERVK)
chr5:147423084-147423712	628	intergenic	No	Segmental duplication		upstream of Polr1d	Yes
chr6:31326434-31326938	504	intragenic	Yes			Gm13845	No	1300 (MalR)
chr6:50538998-50539657	659	intergenic	No	Segmental duplication			Yes
chr6:50550148-50550698	550	intergenic	No	Segmental duplication			Yes
chr6:113006087-113006746	659	intergenic	No	LTR ERVK		upstream of Thumpd3	No
chr6:142150722-142151442	720	intergenic	No	LTR ERV1		upstream of Slco1a6	No
chr7:101326628-101327137	509	intragenic	Yes			Pde2a	No	3600 (ERVK)
chr7:102858318-102858818	500	intragenic	Yes			Olfr578	No	700 (ERVL)
chr8:3753853-3754810	957	intergenic	Yes	Flanking an IAP		upstream of Cd209a	No	0 (IAP)	#8-21	35%(2)/nd(0)	63%(5)/47%(5)	65%(5)/39%(2)	29%(2)	8%(4)/16%(2)	20% (2)/nd(0)	31%(2)/nd(0)	43%(5)/16%(2)
chr8:46508674-46509470	796	intragenic	Yes			Fat1	Yes	9500 (ERVL)
chr8:70297728-70298428	700	intergenic	No	IAP			No
chr8:108358846-108359720	874	intragenic	Yes			Tppp3	No	11000 (MalR)
chr8:126313642-126318800	5158	intergenic	No	LTR ERV1		upstream of Def8	No
chr9:70305954-70306464	510	intergenic	Yes			upstream of Rnf111	No	1800 (ERVL)
chr9:78008668-78009252	584	intergenic	Yes			upstream of Gsta1	No	1950 (ERV1)
chr10:111462566-111463208	642	intergenic	Yes	Flanking an IAP		upstream of Glipr1l1	No	0 (IAP)
chr10:125367090-125367622	532	intergenic	Yes			upstream of Lrig3	No	1400 (MalR)
chr11:3092684-3094268	1584	gene promoter	Yes		ICP	Sfi1	Yes	1700 (MalR)	#11-20	83%(28)/87%(28)	60%(28)/60%(34)	62%(28)/65%(29)	65%(29)	62%(34)/62%(34)	39%(28)/45%(36)	49%(28)/54%(34)	32%(28)/31%(31)
chr12:82343672-82347632	3960	intergenic	No	LTR ERV1		upstream of Adam4	No
chr12:91679764-91680444	680	intragenic	Yes			4930534B04Rik	No	3800 (ERVL)
chr12:105424332-105425032	700	intergenic	No	Segmental duplication		downstream of Snhg10	Yes
chr13:120607554-120614318	6764	intragenic	Yes			Gm7120	Yes	2900 (MalR)	#13-905	69%(96)/76%(94)	68%(103)/65%(113)	73%(100)/86%(73)	69%(100)	64%(107)/64%(106)	49%(123)/47%(132)	47%(95)/44%(104)	33%(111)/32%(111)
chr14:61939286-61939952	666	gene promoter	Yes		LCP	Defb48	No	2050 (MalR)
chr14:118267130-118268124	994	intergenic	Yes			upstream of Hs6st3	No	5000 (MalR)
chr16:4658014-4658630	616	intragenic	Yes	Flanking an IAP		Hmox2	No	0 (IAP)
chr17:23542594-23548144	5550	intragenic	Yes			Srrm2	Yes	9600 (ERV1)
chr17:80472444-80473356	912	gene promoter	No	LTR ERVK	ICP	Cdkl4	No
chr18:67206194-67206890	696	intergenic	No	IAP		upstream of Gnal	No
chrX:30563676-30565046	1370	intergenic	No	Segmental duplication			No
chrX:165322204-165335272	13068	intragenic	Yes			Mid1	Yes	100 (MalR)	#X-505 #X-506 #X-507	52%(33)/69%(20); 92%(32)/93%(32); 80%(19)/83%(19)	86%(9)/83%(9); 87%(18)/68%(18); 79%(30)/75%(28)	84%(9)/87%(11); 87%(12)/85%(16); 74%(19)/71%(20)	70%(17); 98%(12); 72%(19)	100%(10)/100%(10); 51%(12)/49%(6); 46%(19)/46%(21)	20%(25)/28%(18); 61%(10)/54%(20); 37%(21)/45%(28)	86%(3)/53%(8); 12%(6)/56%(12); 12%(18)/15%(20)	49%(8)/55%(11); 50%(19)/54%(19); 15%(19)/16%(19)
*We report the percentage of CpG methylation for replicate RRBS experiments in RRBS regions that overlap with our methylation peaks.
The % value is the average of individual CpGs percentage of methylation in the RRBS region.
The number of CpGs with ≥5 reads in the RRBS region is given in parenthesis.
Note that the large Mid1 peak colocalizes with three covered RRBS regions.
